# Supplementary material for: Physical and electrochemical properties of new structurally flexible imidazolium phosphate ionic liquids
Source: Royal Society of Chemistry journal article supplement (doi:10.1039/d2cp03022e), 2022-01-01
Supplement: d2cp03022e1.pdf [file d2cp03022e1.pdf]

## Supporting Information

# Physical and electrochemical properties of new structurally flexible imidazolium phosphate ionic liquids

**Sourav Bhowmick<sup>1\*</sup>, Andrei Filippov<sup>1</sup>, Inayat Ali Khan<sup>1</sup>, and Faiz Ullah Shah<sup>1\*</sup>**

<sup>1</sup>Chemistry of Interfaces, Luleå University of Technology, SE-971 87 Luleå, Sweden

\*Corresponding:

Email: [sourav.bhowmick@associated.ltu.se](mailto:sourav.bhowmick@associated.ltu.se)

Email: [faiz.ullah@ltu.se](mailto:faiz.ullah@ltu.se)

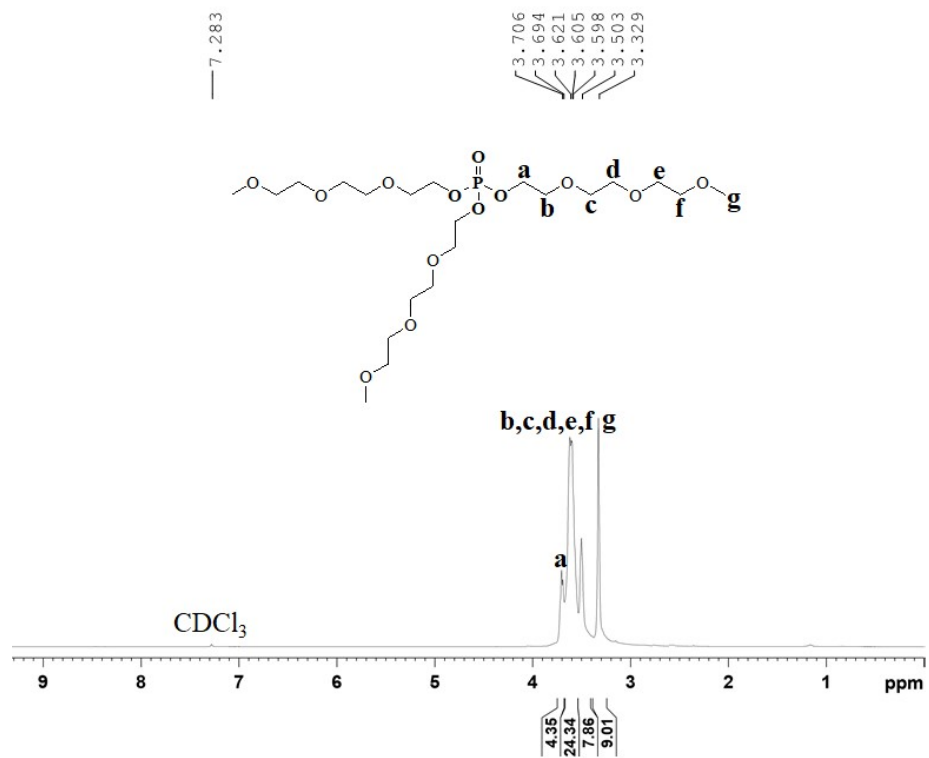

Figure S1: <sup>1</sup>H NMR spectrum of TMOP.

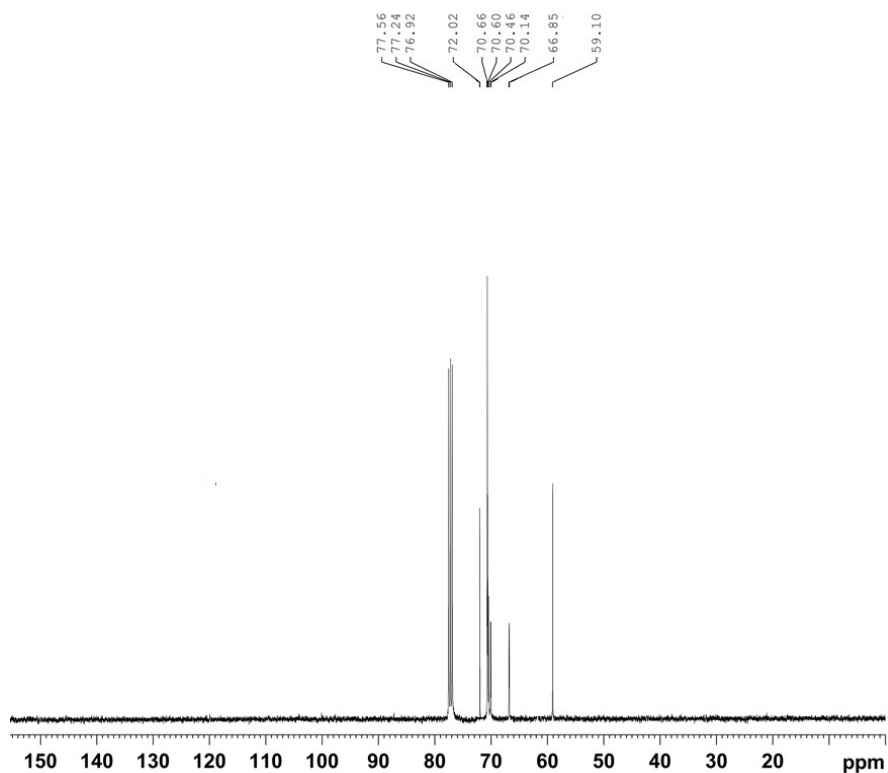

Figure S2: <sup>13</sup>C NMR spectrum of TMOP.

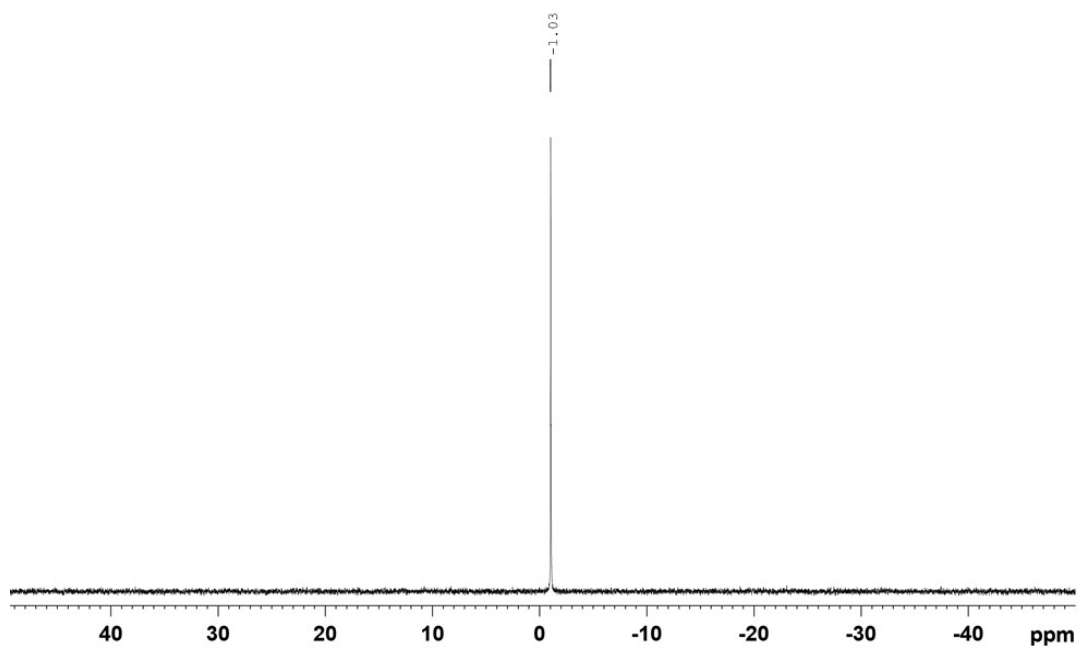

Figure S3: <sup>31</sup>P NMR spectrum of TMOP.

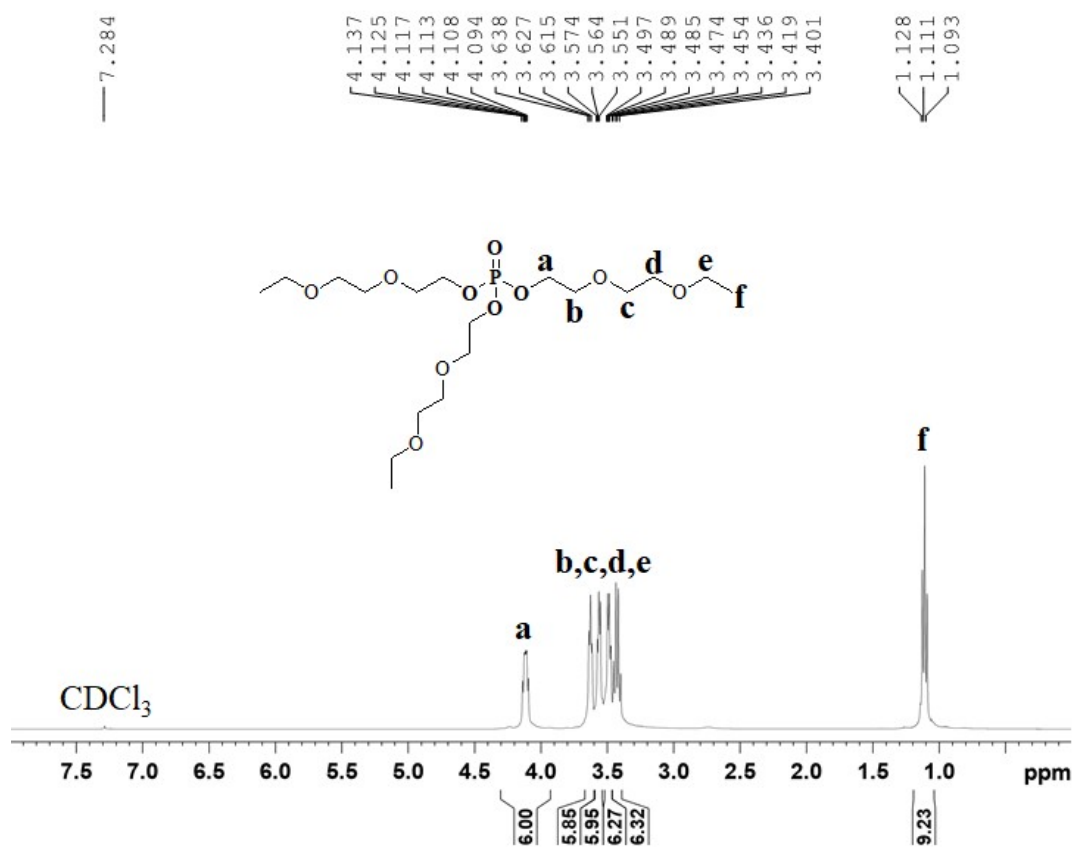

Figure S4: <sup>1</sup>H NMR spectrum of TEOP.

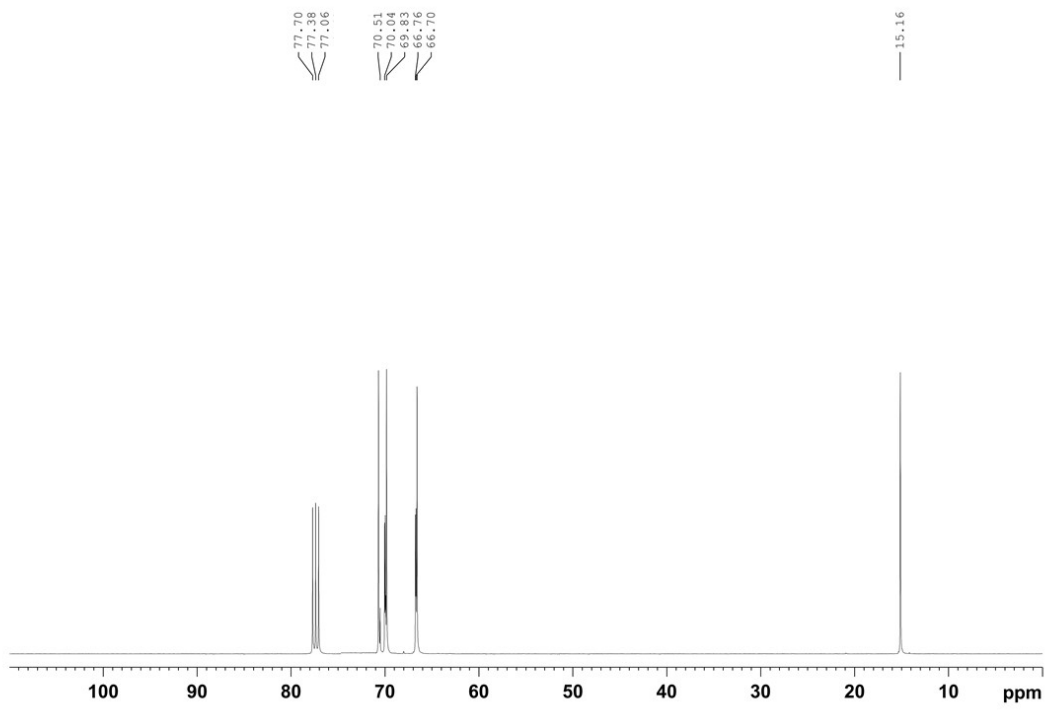

**Figure S5:** <sup>13</sup>C NMR spectrum of TEOP.

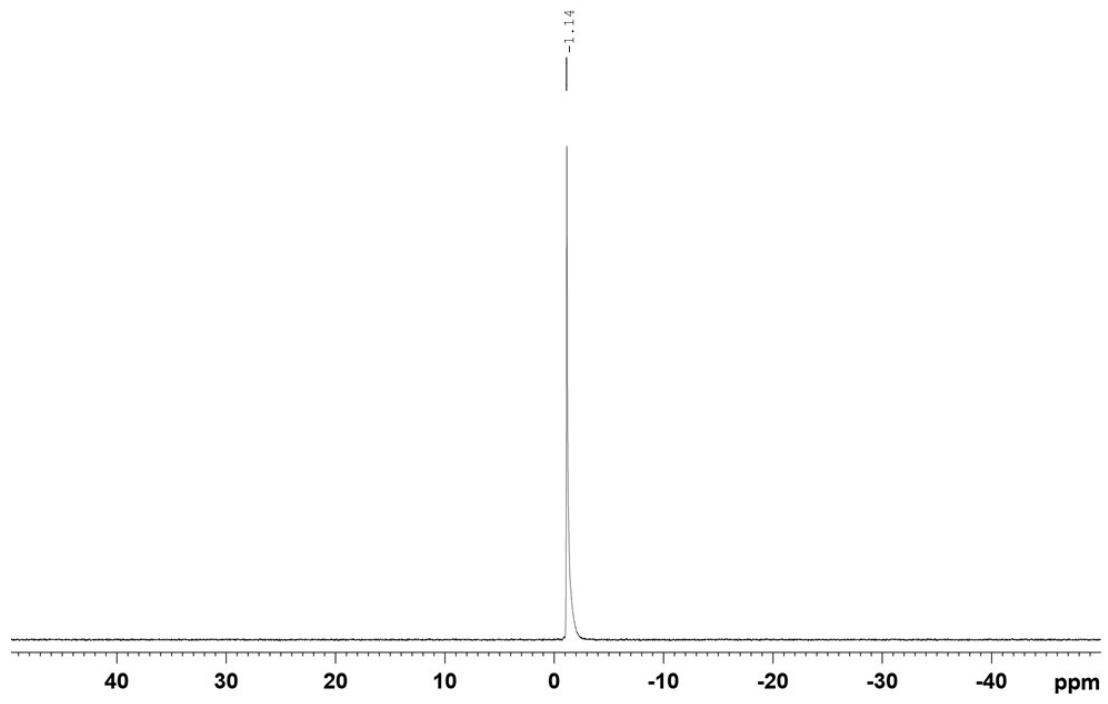

**Figure S6:** <sup>31</sup>P NMR spectrum of TEOP.

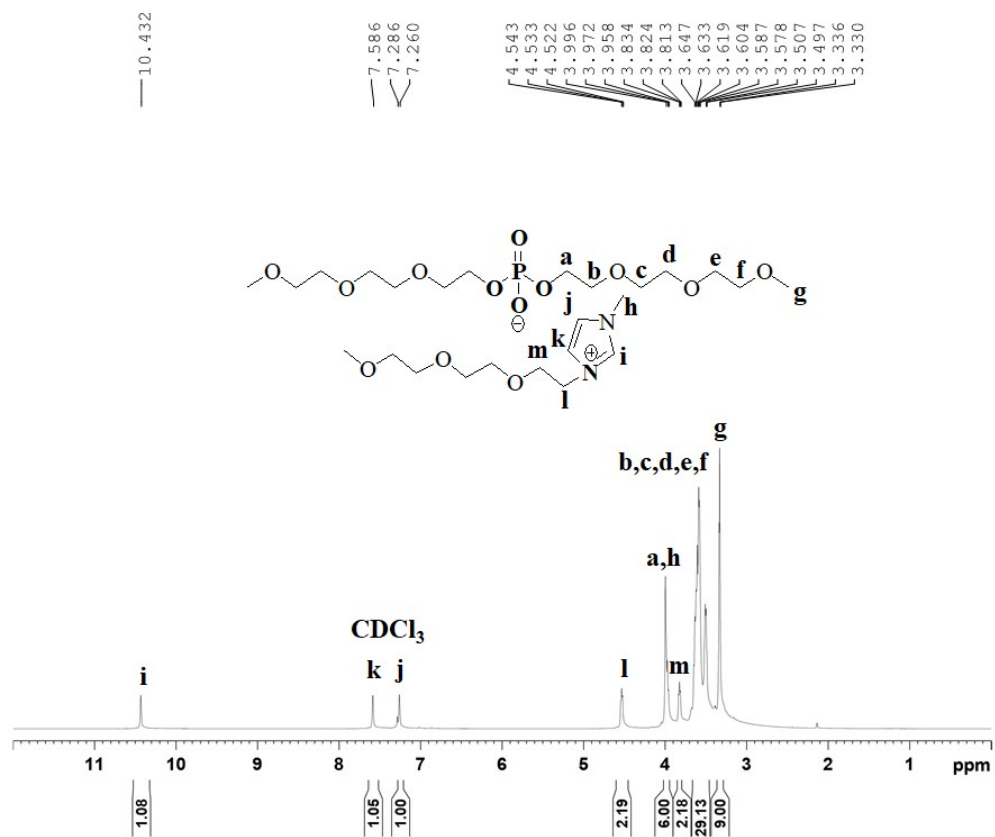

**Figure S7:**  $^1\text{H}$  NMR spectrum of  $[\text{MmMIm}][\text{TEEP}]$ .

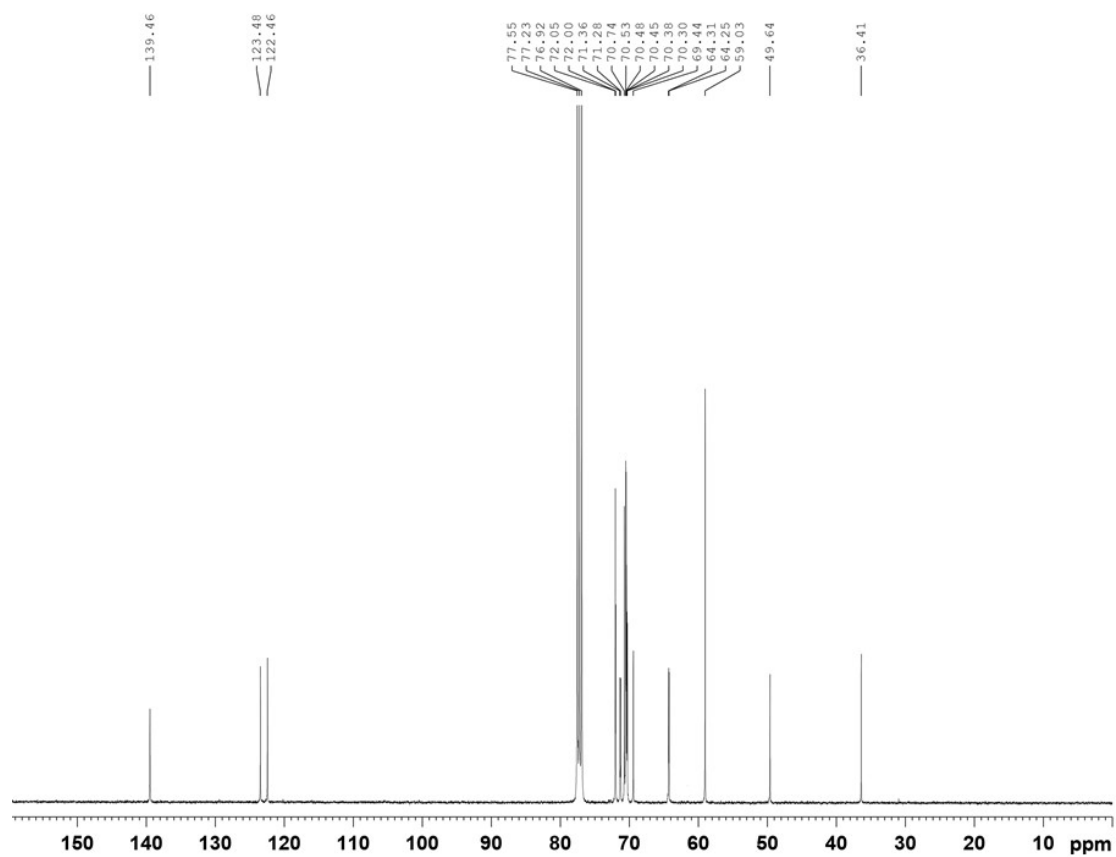

**Figure S8:**  $^{13}\text{C}$  NMR spectrum of  $[\text{MmMIm}][\text{TEEP}]$ .

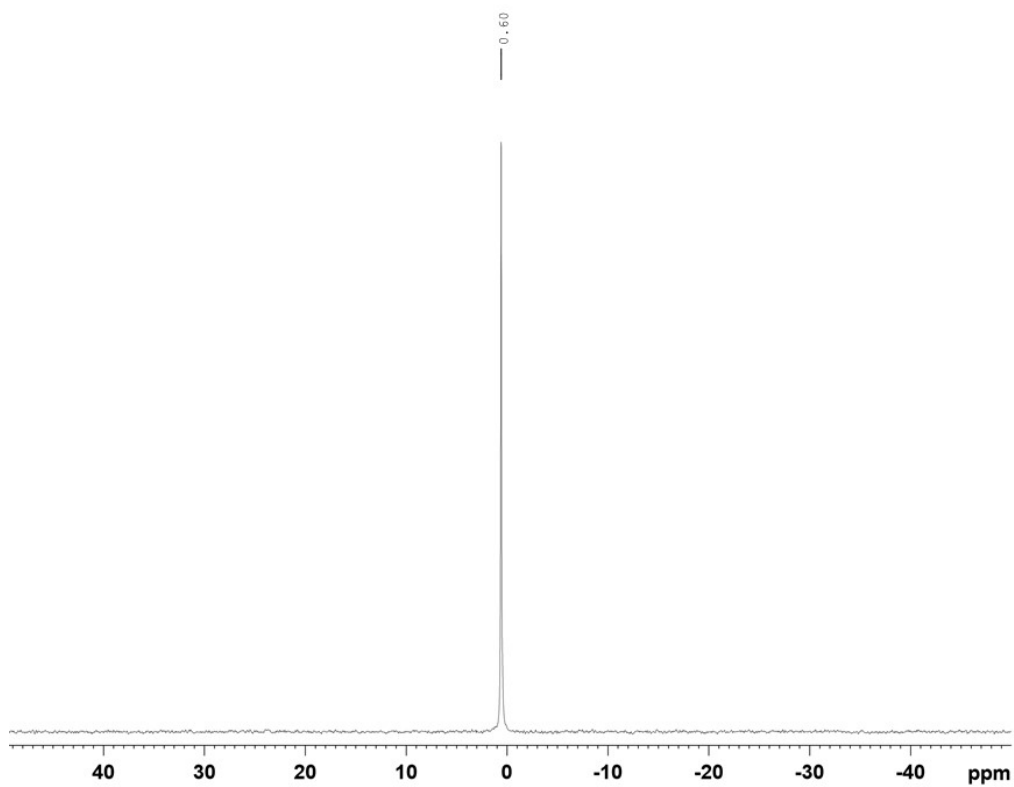

**Figure S9:**  $^{31}\text{P}$  NMR spectrum of [MmMIm][TEEP].

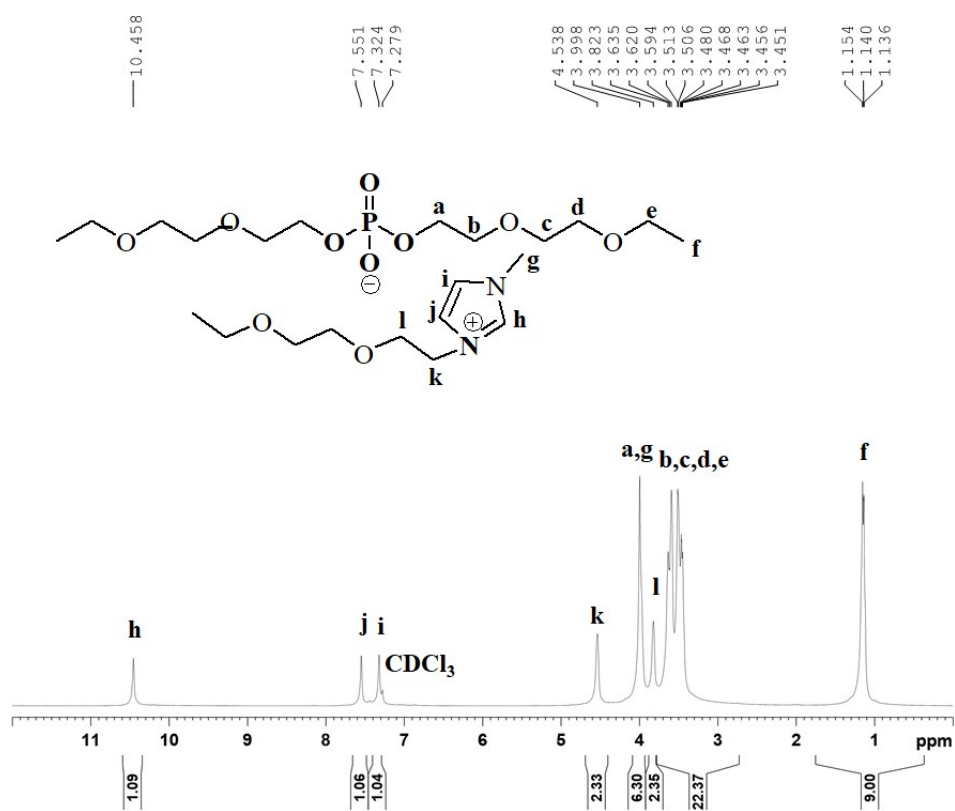

**Figure S10:**  $^1\text{H}$  NMR spectrum of [EmMIm][DEEP].

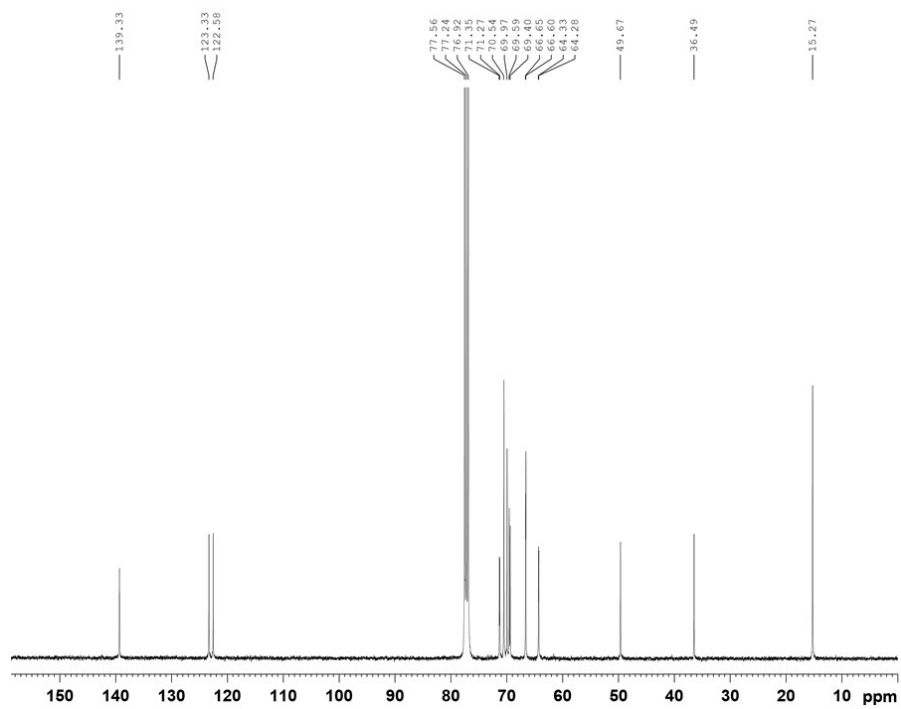

**Figure S11:** <sup>13</sup>C NMR spectrum of [EmMIm][DEEP].

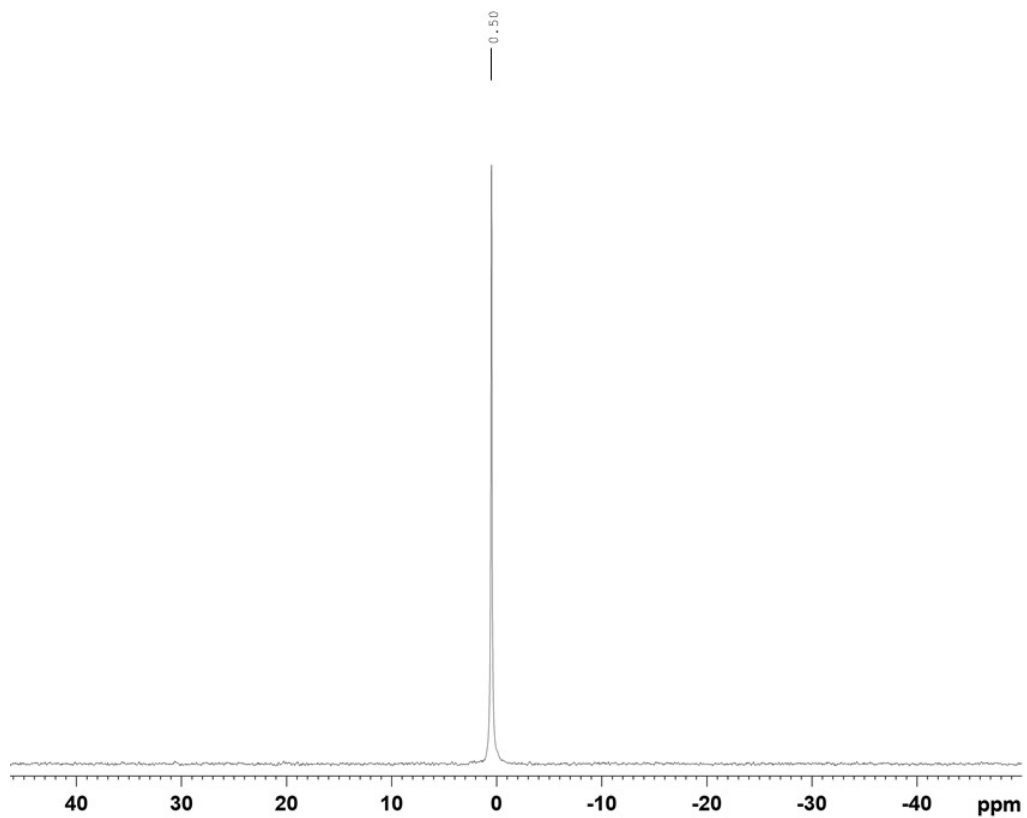

**Figure S12:** <sup>31</sup>P NMR spectrum of [EmMIm][DEEP].

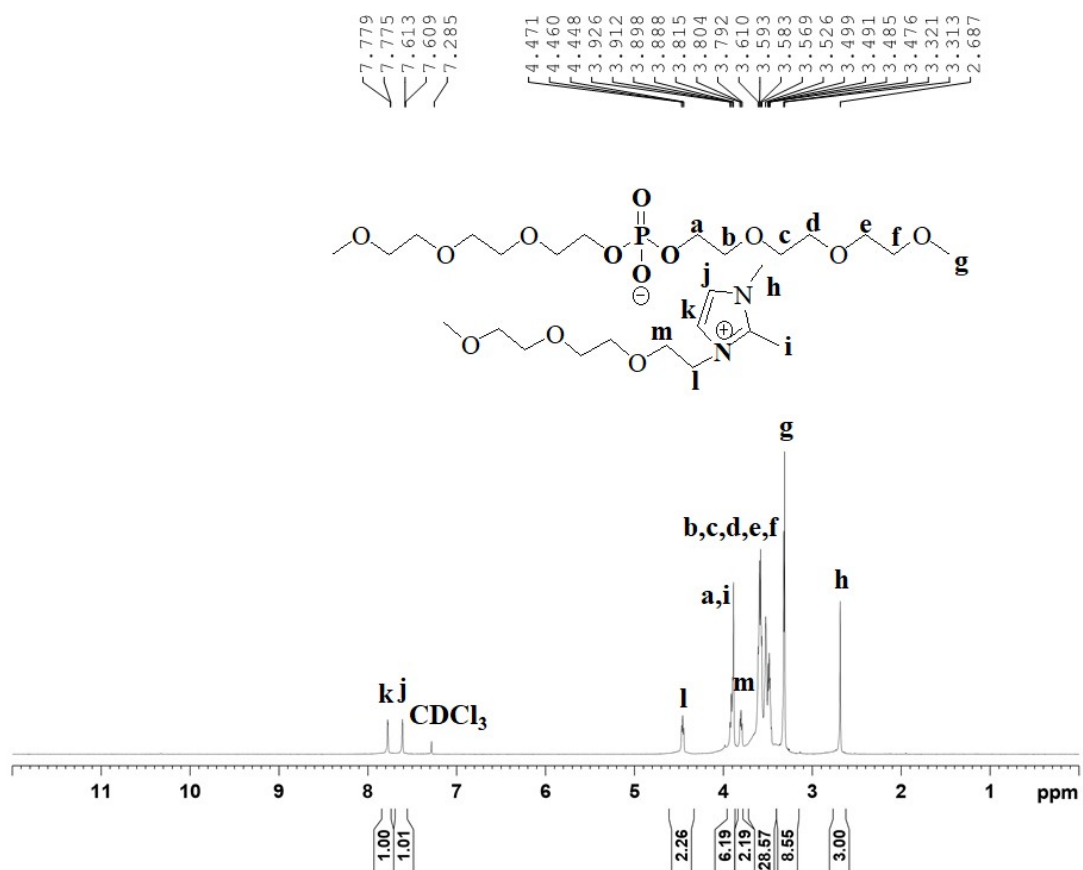

Figure S13: <sup>1</sup>H NMR spectrum of [MmDMIIm][TEEP].

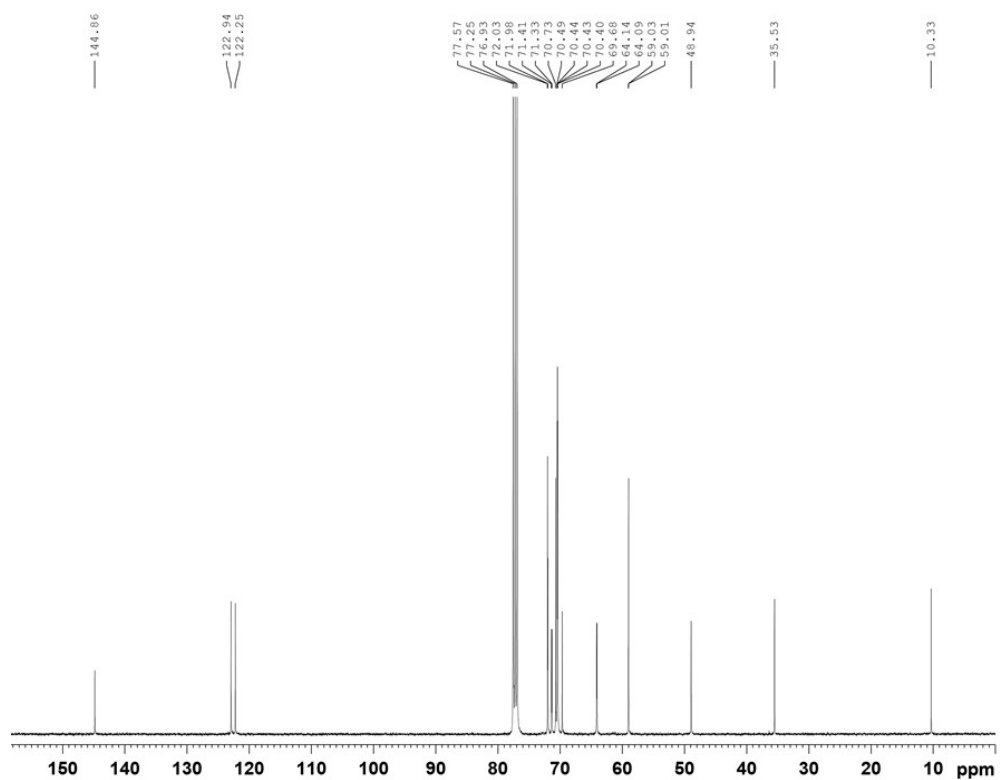

Figure S14: <sup>13</sup>C NMR spectrum of [MmDMIIm][TEEP].



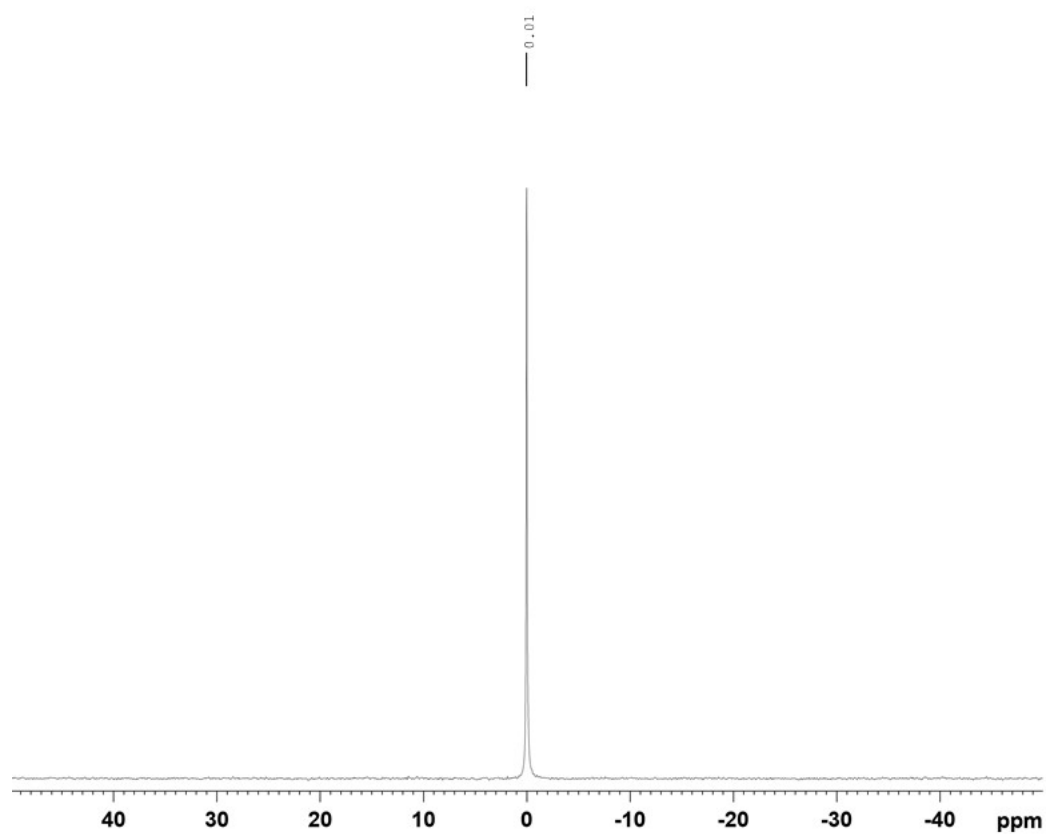

**Figure S15:**  $^{31}\text{P}$  NMR spectrum of  $[\text{MmDMIm}][\text{TEEP}]$ .

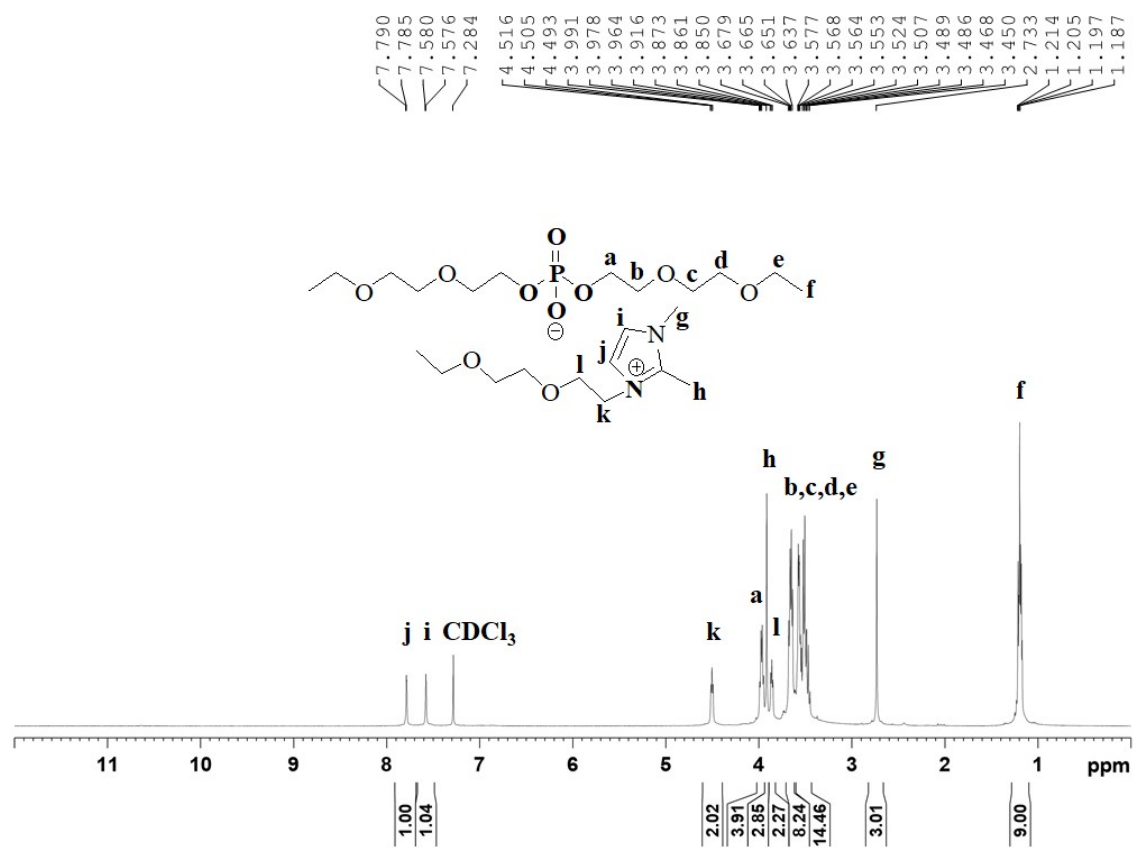

**Figure S16:**  $^1\text{H}$  NMR spectrum of  $[\text{EmDMIm}][\text{DEEP}]$ .

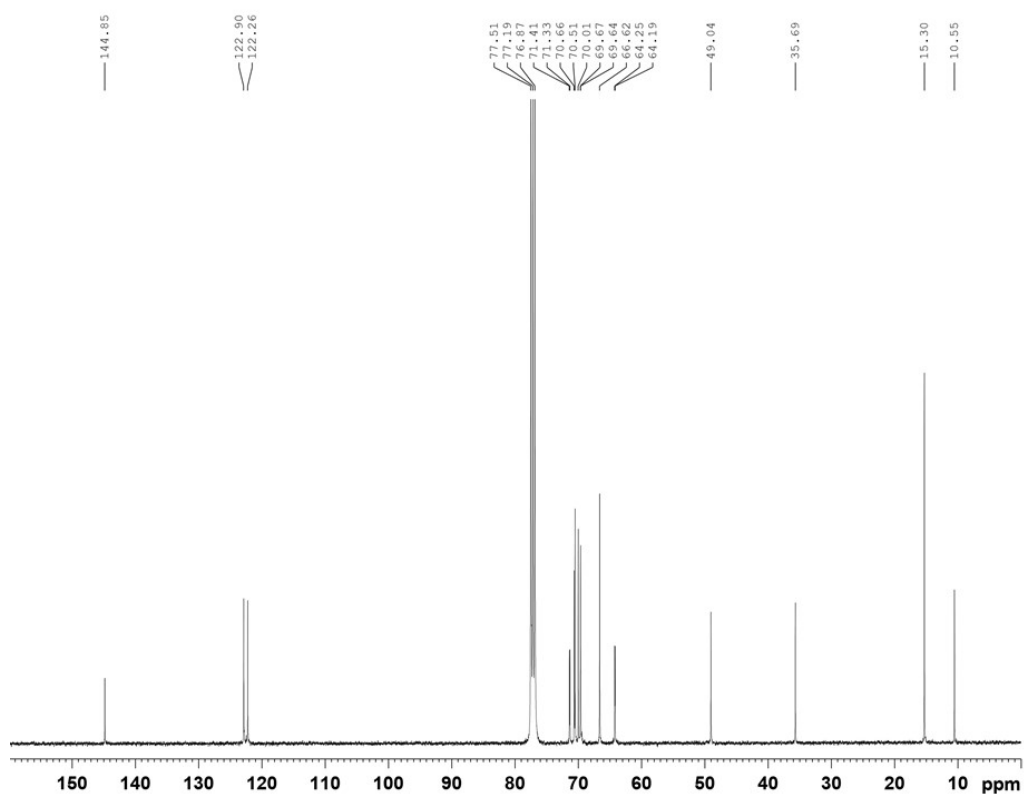

**Figure S17:**  $^{13}\text{C}$  NMR spectrum of [EmDMIm][DEEP].

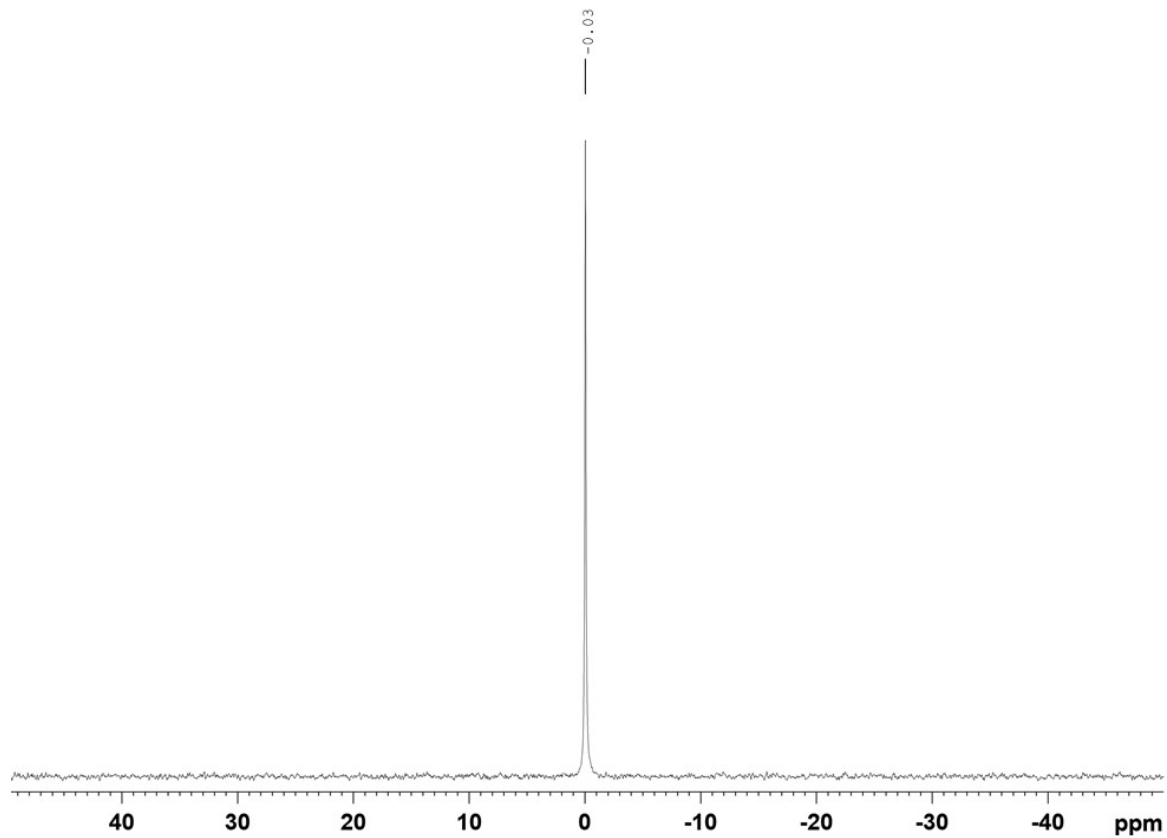

**Figure S18:**  $^{31}\text{P}$  NMR spectrum of [EmDMIm][DEEP].

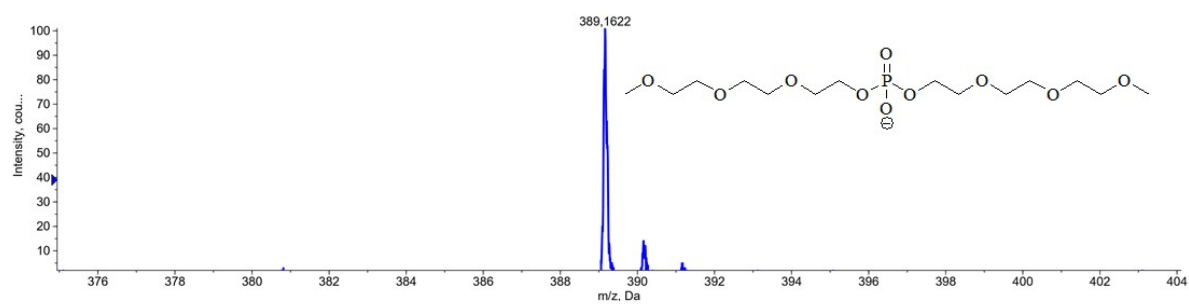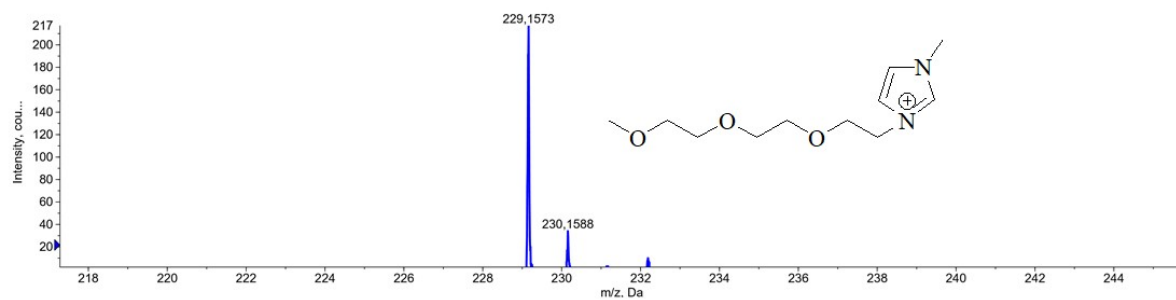

**Figure S19.** ESI-MS of [MmMIm][TEEP].

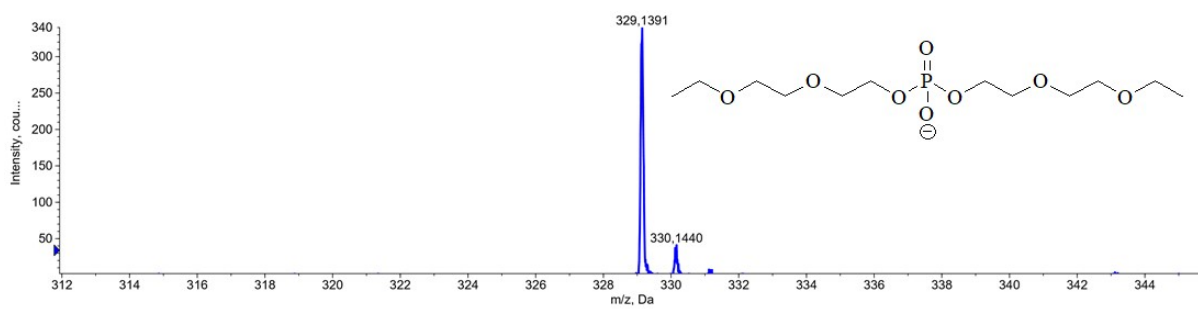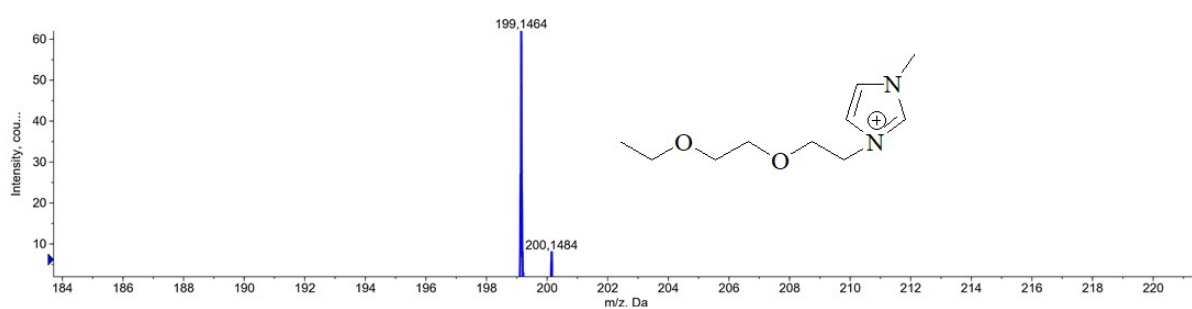

**Figure S20.** ESI-MS of [EmMIm][DEEP].

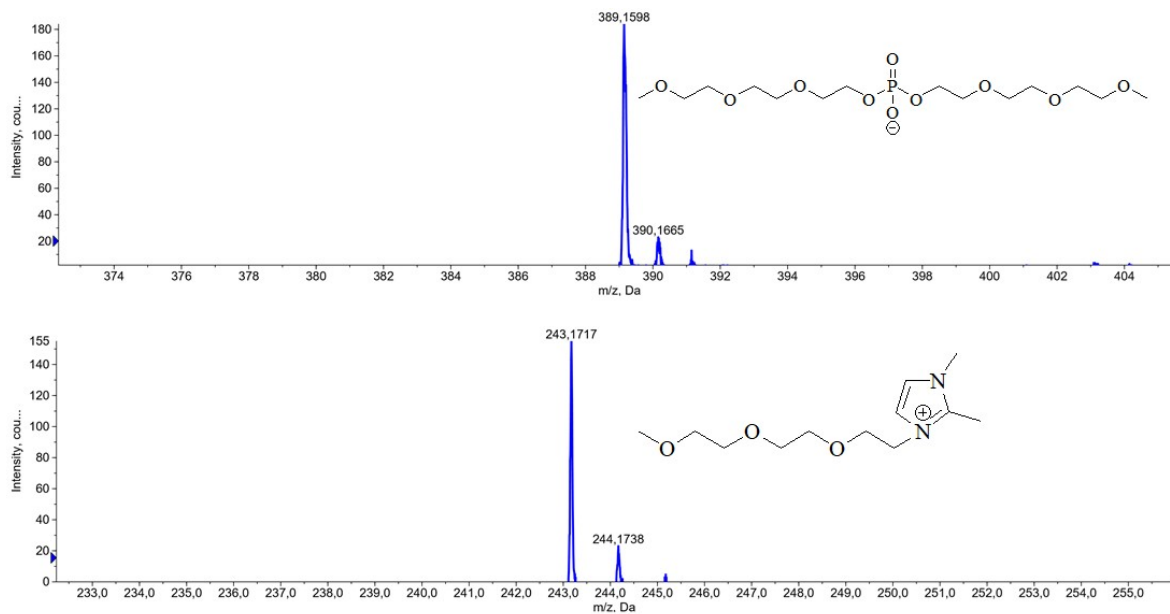

**Figure S21.** ESI-MS of [MmDMIm][TEEP].

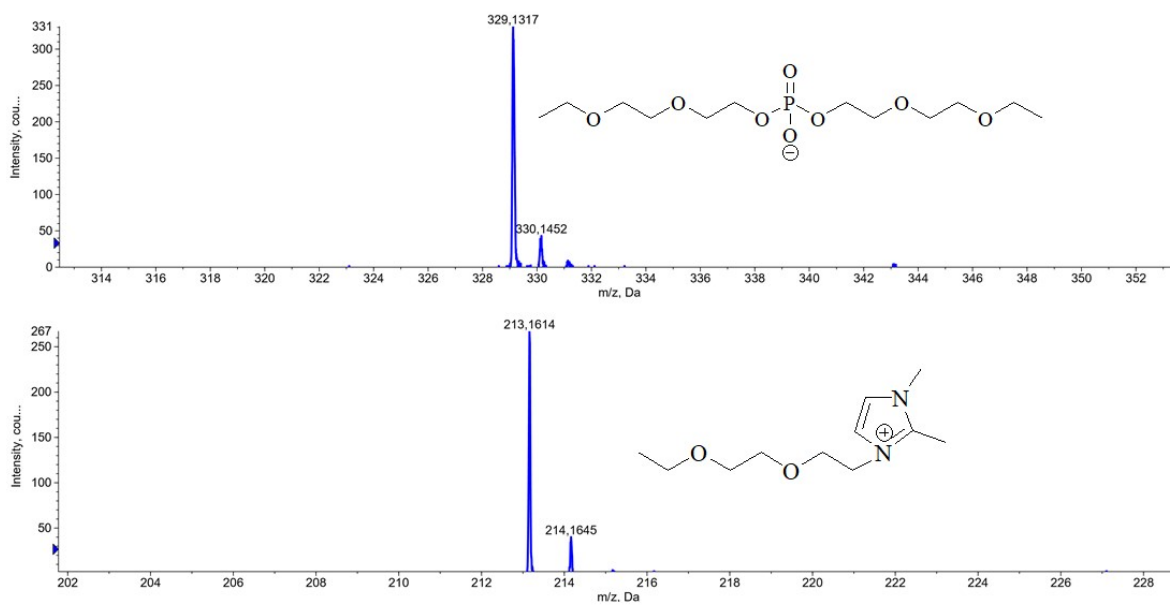

**Figure S22.** ESI-MS of [EmDMIm][DEEP].

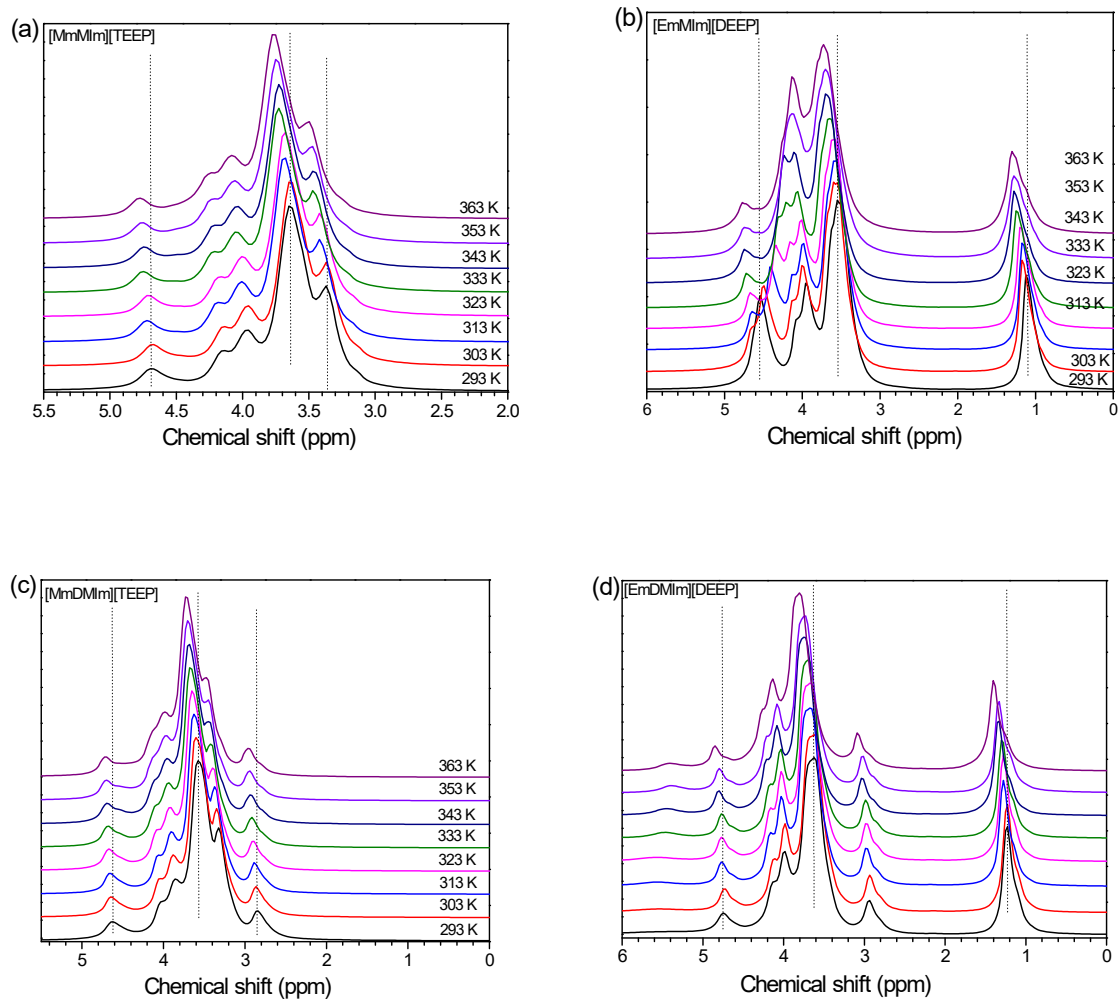

**Figure S23.** Variable temperature chemical shifts  $^1\text{H}$  NMR spectra of four neat ILs.

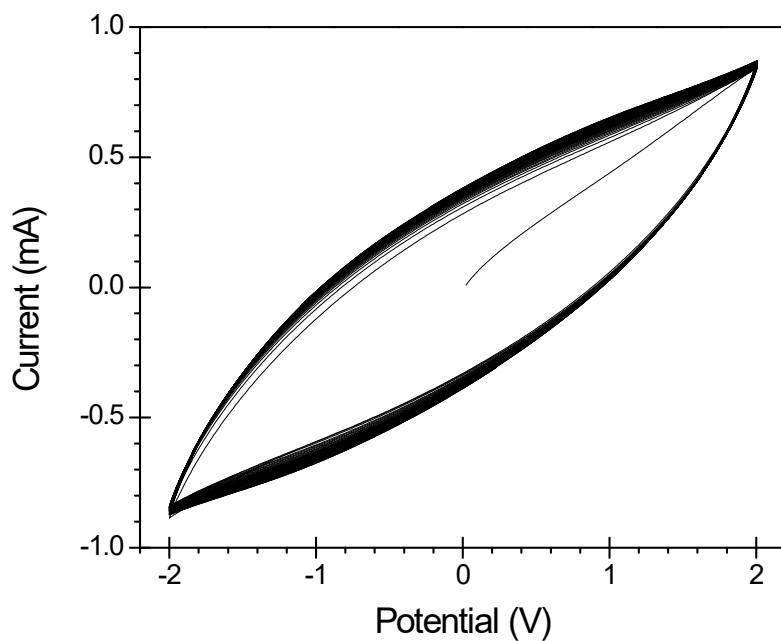

**Figure S24.** CV cycles (60) at  $0.005 \text{ V s}^{-1}$  and at  $20 \text{ }^\circ\text{C}$  for the activation of supercapacitor.

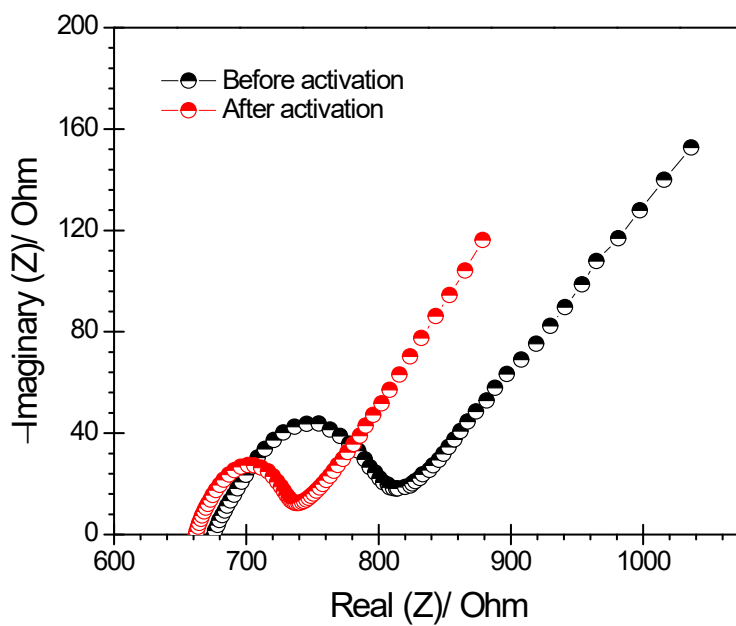

**Figure S25.** Nyquist plots of the supercapacitor before and after 60 CV cycles.

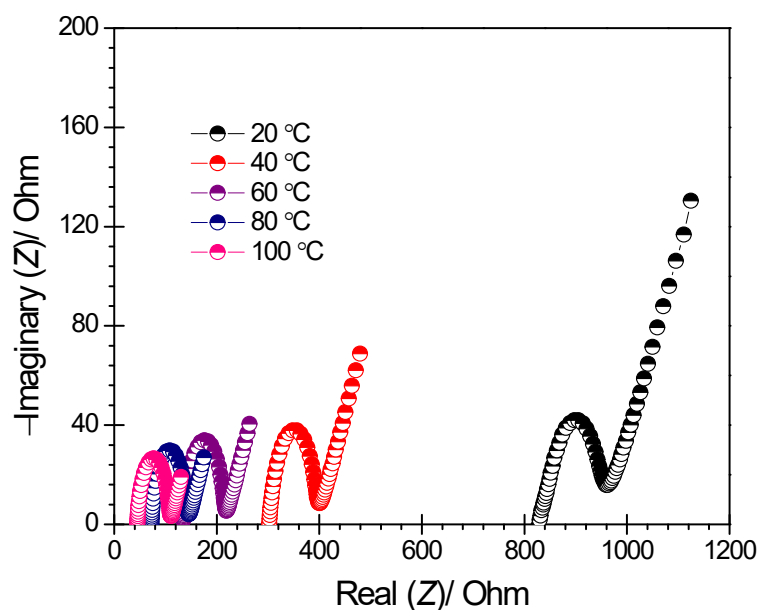

**Figure S26.** Different temperature EIS plots of the supercapacitor.

**Table S1.** Anodic and cathodic limits potentials and electrochemical stability windows (ESWs) on platinum working electrode at a scan rate of  $0.001 \text{ V s}^{-1}$  and at  $20 \text{ }^\circ\text{C}$ .

| Ionic Liquid   | $E_C$ (V vs Fc/Fc <sup>+</sup> ) | $E_A$ (V vs Fc/Fc <sup>+</sup> ) | $\Delta E$ (V) |
|----------------|----------------------------------|----------------------------------|----------------|
| [MmMIm][TEEP]  | -1.10                            | 3.47                             | 4.57           |
| [EmMIm][DEEP]  | -1.11                            | 3.25                             | 4.36           |
| [MmDMIm][TEEP] | -1.54                            | 4.34                             | 5.88           |
| [EmDMIm][DEEP] | -2.33                            | 2.93                             | 5.26           |

**Table S2.** VFT equation parameters and apparent energies of activation for the ionic conductivity data.

| Ionic Liquid   | $\sigma_0$ (m <sup>2</sup> /s) | $B$ (K) | $T_0$ (K) | $E_\sigma$ (kJ/mol) |
|----------------|--------------------------------|---------|-----------|---------------------|
| [MmMIm][TEEP]  | 0.542                          | 1227    | 153       | 10.2                |
| [EmMIm][DEEP]  | 0.709                          | 1279    | 156       | 10.6                |
| [MmDMIm][TEEP] | 0.725                          | 1378    | 152       | 11.5                |
| [EmDMIm][DEEP] | 0.348                          | 1176    | 164       | 9.78                |

**Table S3.** VFT equation parameters and apparent activation energy for the ion diffusivity data.

| System         | Ion    | $D_0 \times 10^{-9}$<br>m <sup>2</sup> /s | B, K | $T_0$ , K | $E_D$ ,<br>kJ/(mol) |
|----------------|--------|-------------------------------------------|------|-----------|---------------------|
| [MmMIm][TEEP]  | anion  | 7.91                                      | 786  | 195       | 6.5                 |
|                | cation | 6.48                                      | 760  | 198       | 6.3                 |
| [EmMIm][DEEP]  | anion  | 14.3                                      | 811  | 184       | 6.7                 |
|                | cation | 15.1                                      | 887  | 176       | 7.4                 |
| [MmDMIm][TEEP] | anion  | 19.6                                      | 1070 | 180       | 8.9                 |
|                | cation | 15.2                                      | 1013 | 184       | 8.4                 |
| [EmDMIm][DEEP] | anion  | 3.64                                      | 626  | 213       | 5.2                 |
|                | cation | 5.55                                      | 753  | 201       | 6.3                 |

**Table S4.** Water content of the ILs

| Ionic Liquid   | Water Content (ppm) |
|----------------|---------------------|
| [MmMIm][TEEP]  | 95 ± 5              |
| [EmMIm][DEEP]  | 88 ± 5              |
| [MmDMIm][TEEP] | 97 ± 5              |
| [EmDMIm][DEEP] | 78 ± 5              |
